1 **Rapid Screening Methods of Potato Cultivars for Low Glycemic Trait**

2 Rocio Rivas<sup>1</sup>, Edward Dratz<sup>2</sup>, Thomas Wagner<sup>3</sup>, Gary Secor<sup>4</sup>, Amanda Leckband<sup>1</sup>, and David C.  
3 Sands<sup>1</sup>

4<sup>1</sup>Department of Plant Sciences and Plant Pathology, Montana State University, Bozeman, MT,

5<sup>2</sup>Department of Chemistry and Biochemistry, Montana State University, <sup>3</sup>Tater Seed, Everett,  
6 WA, <sup>4</sup>Department of Plant Pathology, North Dakota State University, Fargo, ND  
7  
8

9

## 10 **Abstract**

11           Potatoes are a dietary staple consumed by a significant portion of the world, providing  
12 valuable carbohydrates and vitamins with minimal fat. Most commercially produced potatoes have  
13 a high content of highly branched amylopectin starch, which generally results in a high glycemic  
14 index (GI). Consumption of foods with high levels of amylopectin elicit a rapid spike in blood  
15 glucose levels, which is undesirable for individuals who are pre-diabetic, diabetic, or obese. Some  
16 cultivars of potatoes with lower amylopectin levels have previously been identified and are  
17 commercially available in niche markets in some countries but are relatively unavailable in the  
18 United States and Latin America. Among Native communities in North America and in the high  
19 Andes countries of South America, some foods that include certain potato cultivars, may have  
20 been used to help people mitigate what is now defined as the effects of blood sugar and obesity.  
21 These cultivars are not widely available on a global market. This study utilizes three independent  
22 analyses of potato starch: microscopic examination of granule structure, water absorption, and  
23 spectrophotometry of iodine complexes to identify potato cultivars with low amylopectin that are  
24 thought to have low GI potential. Differences among cultivars tested were detected by all three  
25 types of analyses. Of the 60 potato cultivars evaluated the most promising are Huckleberry Gold,  
26 Muru, Multa, Green Mountain, and an October Blue x Colorado Rose cross. Further work is  
27 necessary to document the ability of these low amylopectin cultivars to reduce blood glucose spike  
28 levels in human subjects.

## 29 **Keywords**

30 *Solanum tuberosum*; amylose, amylopectin, diabetes, microscopy; starch granules, starch swelling  
31 capacity.

## 32 **Introduction**

33  
34           Current lifestyles have led much of the general population to become relatively sedentary  
35 and to adopt questionable eating habits, including high consumption of foods which appear to drive  
36 an alarming rise in the incidence of obesity and Type 2 diabetes worldwide (1-3). This problem is  
37 especially severe in low-income populations, where inexpensive high-energy foods tend to be  
38 consumed, instead of more expensive foods with more balanced nutrition (4). Potatoes are a  
39 popular staple food, available to consumers at a low cost per pound that can be easily stored. Potato  
40 starch is also widely used in the food industry as a processed food ingredient (5,6). Most varieties  
41 of potatoes have high levels of amylopectin starch, which is highly branched and rapidly digested.

42 High levels of amylopectin which causes a rapid spike in blood glucose level that occurs after  
43 consumption of high glycemic index potatoes (2, 7–9).

44 Figure 1 (below) illustrates the difference in response of a typical individual’s blood sugar  
45 levels to high and low glycemic index foods. Most varieties of potatoes are in the high glycemic  
46 category of foods that people with prediabetes, diabetes, or obesity should seek to avoid. Not only  
47 do high glycemic foods give a large spike in blood sugar levels, the body's response to try to bring  
48 the level down tends to cause what is referred to as an undershoot, bringing levels below its  
49 desirable amount. This low level of blood sugar tends to stimulate hunger and the desire to  
50 consume more high glycemic foods. It follows that high glycemic foods tend to cause a “roller  
51 coaster” effect on blood sugar and may cause excessive food consumption (10).

52 **Figure 1:** Blood plasma glucose response (mmol/l) from a high versus a low glycemic index (GI)  
53 food. The high glycemic food tends to cause an “undershoot” in the blood glucose level below the  
54 desirable level, which also tends to stimulate hunger and consumption of additional high glycemic  
55 foods (10).

56 The high glycemic index of widely available potatoes presents a problematic “consumer’s  
57 dilemma” for individuals and families that may not be able to afford a better-balanced, more  
58 favorable diet (2, 7–9). The food industry has addressed this situation, particularly in Denmark and  
59 Australia (8,11), by providing and promoting lower glycemic varieties of potatoes that are  
60 relatively unavailable in the United States and most other countries. Some native communities in  
61 the Andes (Bolivia, Chile, and Peru) reportedly embrace a tradition of providing low glycemic  
62 tubers to people with obesity or diabetes (12).

63 Potato starch consists of two major types of carbohydrates, amylose and amylopectin (13).  
64 Amylose, less abundant in most varieties of potato tubers, has a linear repeating glucose 1-4 linked  
65 polysaccharide backbone structure that digests relatively slowly. Amylopectin shares the glucose  
66 1-4 linked chains and additionally contains highly branched beta 1-6 side chains that produce a  
67 broader structure (8,14–20) that digests much faster than amylose that can present metabolic  
68 imbalances. Starch granule synthesis proceeds with the formation of amylose first and amylopectin  
69 is layered on the outside of the granules. Typical high amylopectin potato starch granules have a  
70 smooth rounded surface with concentric rings, formed by amylopectin (21,22).

71 Researchers have found that a higher ratio of amylose/amylopectin correlates with loss of  
72 surface smoothness in starchy granules (9,23). We noticed when screening potato starch granules,  
73 that some potato cultivars showed a highly disrupted starch granule surface, observed under the  
74 bright field microscope at 400x, while granules from other cultivars have a smooth appearance.  
75 The surface structure of the starch granules might be useful as an initial screen for identifying  
76 promising varieties with higher amylose starch content, that would favor a low Glycemic Index  
77 (GI) (9,16,20,25,26). In addition, the swelling capacity (water absorption capacity) of the starch  
78 has also been reported to correlate with the amylose/amylopectin ratio (18,26–30).

79 Zhu et al. (31), observed that high amylose rice consumption had beneficial health effects  
80 on obese rats, by reducing blood sugar levels and body weight, which would presumably also have  
81 positive health benefits for humans (2,23,24,31). This might be consistent with beliefs and dietary  
82 recommendations about types of plants among Native communities in Peru and Chile, but  
83 unfortunately most of their traditional potato germplasm was lost during the colonization of the  
84 region (12). However, potato varieties maintained in seed banks or that may already have been  
85 commercialized might possess beneficial, low glycemic traits. We focused on screening 60 potato

86 varieties and selections in this study to investigate the relationship between starch granule  
87 conformation, swelling power and amylose: amylopectin ratios, seeking to validate rapid screening  
88 methods for low GI potential. The favorable lines revealed from this screening study can be used  
89 for further agronomic, breeding, and human GI testing.

## 90 **Methods and Materials**

### 91 **Potato Material Tested**

92 A collection of 60 potato varieties and selections of potato germplasm were obtained from research  
93 laboratories of Montana State University, the USDA potato collection (32), commercial seed  
94 producers, and private breeder Tom Wagner, Everett, Washington. These varieties were tested for  
95 low GI potential using starch granule morphology, water absorption capacity and amylose content,  
96 as described below. The potato materials were chosen for their favorable agronomic traits and  
97 increased in the MSU greenhouse for testing. Three tubers of each variety or selection were  
98 analyzed according to the schematic flow chart shown in Figure 2.

99

100 **Figure 2:** Schematic flow chart illustrating starch analysis of 60 selected potato varieties and  
101 selections.

### 102 **Morphological analysis of starch granules**

103 A cork-borer was used to remove a core (1cm x 1 cm) from the center medullary tissue of tubers  
104 for observation. Tubers were assayed several months after harvest and storage. A subsample 5  
105 mm<sup>2</sup> was pressed onto a microscope slide, covered with a cover slip and viewed with a bright  
106 field microscope (Nikon Eclipse E440) at 400x magnification and photographed. Starch granules

107 from each variety or selection was numerically graded using a grading scale assessment (GSA).  
108 The GSA was numerically graded according to the numerical scale described in figure 2 . Three  
109 different tubers of each variety or selection were examined and photographed. Each variety was  
110 given more than one rating score if the granules within the picture showed diversity, as explained  
111 further in the results section.

112 **Figure 3:** Grading scale for starch granule assessment: 0= whole granules with smooth visible  
113 hilum 1= whole smooth granules with dots 2= whole smooth granules with surface alterations  
114 (wrinkles) 3= Whole granules with large wrinkles 4= Starch granule surface fractures 5= collapsed  
115 granule

### 116 **Water absorption capacity of starch**

117 The swelling capacity (SC) or water absorption capacity (WAC) measures the ratio  
118 between weights for the hydrated starch flour gel and dry flour samples. Samples with increased  
119 amylose concentrations support lower water absorption after starch jellification (26–28,33–35).  
120 WAC was evaluated using a procedure modified from Martin (34). Potato samples were freeze  
121 dried and processed into powdered form in a coffee grinder to obtain potato flour  
122 consistency. Thirty to forty mg of potato flour was weighed in pre-weighed 2 mL screw top glass  
123 tubes and the total weight measured to four significant figures. To each tube 1.5 ml of distilled  
124 water was added to the tubes capped, vortexed, placed in a thermo-mixer (Thermo Fisher) at 92  
125 °C, and mixed at 800 RPM for 30 minutes. The tubes were removed and centrifuged at 1000g for  
126 10 minutes at 4° C. The supernatant was aspirated from the tubes, carefully avoiding the gelatinous  
127 layer, and the tubes reweighed. The capacity to absorb water was calculated by dividing the flour  
128 plus water weight by the dry flour weight.

## 129 **Spectrophotometric Analysis of Starch Properties**

130 Rundle (36) first reported a marked difference in iodine inclusion between amylose and  
131 amylopectin and developed a spectrophotometric method that allows quantification of both  
132 components in mixtures. We used this spectrophotometric method, following modifications by  
133 Jarvis and Walker (37) and Fajardo, et al (16), to quantify the amylose/ amylopectin ratios. 20 mg  
134 of freeze-dried potato flour was suspended in 2ml of 80% ethanol in a 15 ml plastic tube and mixed  
135 with a Vortex Shaker for a short period of time. Samples were centrifuged at room temperature for  
136 30-60 seconds at top speed in a clinical centrifuge and the supernatant carefully removed. This  
137 washing procedure was repeated twice. The resulting washed starch (pellet) was mixed with 5ml  
138 of water and 5ml of 1 M KOH in the same tube and vortexed. It is important to use ultra-pure water  
139 in the analysis for reproducible results and the absorbance value of the iodine solution at 550 nm  
140 versus solvent is near 0.1, as the iodine solution is light and age sensitive (16). Precision in the  
141 preparation of the iodine and the amylopectin/amylose solutions is crucial to getting reliable  
142 amylose determinations. Since we are determining the proportion of amylose content rather than  
143 the exact amount of amylose in the potato starch, there is no purification step for the isolation of  
144 pure starch from the potato powder as presented by other determination methods. One ml of this  
145 mixture was transferred into a 50 ml tube, neutralized with 5ml of 0.1M HCl, mixed with 0.5 ml  
146 of Lugol solution (37), and adjusted to 50ml final volume with distilled water. The samples were  
147 prepared in triplicate and allowed to stand for 15 min at room temperature, before measurement to  
148 stabilize the inclusion of the iodine. Each sample was placed in a one cm plastic spectrophotometer  
149 cuvette and absorption spectra recorded from 480-800 nm versus a distilled water blank using a  
150 Genesis 10 UV Instrument (Thermo Fisher Scientific). The spectra were analyzed utilizing the  
151 Vision Lite software (Thermo Fisher).

152

153 **Figure 4: Spectra of solutions of known concentrations of potato starch polysaccharide**  
154 **mixtures of amylose (referred on the figure as amilosa) and amylopectin. The spectrum**  
155 **marked Yodo is the iodine containing reagent solution blank.**

## 156 **Data Analysis**

157 The data obtained was processed using the statistical software Stat Plus: Mac LE 2009.

## 158 **Results Morphological Analysis of Starch Granules.**

159 We noticed that for most potato varieties and selections, virtually all the granules in each  
160 sample were quite similar in appearance. In other cases, there was a high diversity of granular  
161 appearance. For these cases, two scores were assigned, as shown in Table 1 with a rough  
162 percentage of the granules the scores represented. Figure 5 shows that the granules in the common  
163 commercial varieties Russet Burbank and Yukon Gold, known to have a high amylopectin content  
164 (72% and 69% respectively), showed very smooth granules within a distribution in the sizes of  
165 their granules. The previously shown grading scale in Figure 3 dictated that the granules in Figure  
166 5 fit a GSA rating of 1.

167

168 Figure 5: Bright field microscopic photos of smooth starch granules of Yukon Gold (left) and  
169 Russet Burbank (right) at 400x. These granules were given a GSA rating of 1.

170 In contrast, the starch granules in only a few potato varieties showed significant granular surfaces,  
171 and had higher GSA values. Huckleberry Gold, Muru , and Mich-Oct have GSA ratings of 5, as  
172 shown in Figure 6, where 90-95% of the total granules observed presented collapsed surfaces, the



173 other 5-10% correspond to granules with minor irregularities. The variety Multa graded 4 GSA  
174 with 60-65% of the granules presenting a surface fracture level, and the 35-40% corresponded to  
175 minor irregularities.

176

177 Figure 6: Starch granule images from left to right are Huckleberry Gold, Muru, Multa, Bzura, and  
178 Michigan October.

179 The GSA ratings and percent starch granules in the GSA rating of 60 varieties and selections are  
180 listed in Table 1.

| Variety or Selection | GSA Rating | % Uniformity |
|----------------------|------------|--------------|
| Bjorna               | 5          | 55-60        |
| Bzura                | 5          | 70-75        |
| Huckleberry Gold     | 5          | 100          |
| I 1035               | 5          | 90-95        |
| Laram K'anchali      | 5          | 75-80        |
| Muru                 | 5          | 100          |
| Olalla               | 5          | 75-80        |
| Arma                 | 4          | 45-50        |
| Bolivian Blizzard    | 4          | 80-85        |
| Bareroot River       | 4          | 85-90        |
| I 1036               | 4          | 85-90        |
| Multa                | 4          | 60-65        |
| Green Mountain       | 3          | 60-65        |

|                      |   |       |
|----------------------|---|-------|
| Iker                 | 3 | 45-50 |
| Juice Valley         | 3 | 45-50 |
| Lumper               | 3 | 50-55 |
| Marble Gold          | 3 | 85-90 |
| Monona               | 3 | 35-40 |
| Oct Blue             | 3 | 85-90 |
| Oct Blue x Col Rose  | 3 | 85-90 |
| Pirola               | 3 | 65-70 |
| Biddy Taro           | 2 | 65-70 |
| Bison                | 2 | 90-95 |
| C97007               | 2 | 85-90 |
| Cherry red           | 2 | 80-85 |
| Katelidan            | 2 | 45-50 |
| Norland              | 2 | 75-80 |
| Papa Amorga          | 2 | 85-90 |
| Purple Valley        | 2 | 65-70 |
| Red Pontiac          | 2 | 50-55 |
| Allegany             | 1 | 20-30 |
| Anolla               | 1 | 35-40 |
| Asun                 | 1 | 45-50 |
| Bolivian Spring      | 1 | 90-95 |
| Russet Burbank       | 1 | 90-95 |
| Charlotte            | 1 | 90-95 |
| Chella x Bulk Clover | 1 | 90-95 |

|                         |   |       |
|-------------------------|---|-------|
| Garnet Chile            | 1 | 90-95 |
| Golden Anniversary      | 1 | 85-90 |
| Goldra                  | 1 | 80-85 |
| Leona                   | 1 | 85-90 |
| Mich Oct x John T       | 1 | 85-90 |
| NH x SPG                | 1 | 45-50 |
| Nicola                  | 1 | 45-50 |
| Phytophyter             | 1 | 35-40 |
| Picasso                 | 1 | 45-50 |
| Rush Share              | 1 | 45-50 |
| Sangre                  | 1 | 45-50 |
| Sassy Lassy             | 1 | 85-90 |
| Skagit Magic            | 1 | 90-95 |
| Violet Butter           | 1 | 40-45 |
| X gem                   | 1 | 60-75 |
| Yukon Gold              | 1 | 80—85 |
| Arcilla-597779          | 0 | 100   |
| Chelan                  | 0 | 100   |
| Chipitiquilla           | 0 | 100   |
| Dark Red Norland        | 0 | 100   |
| Fontenay                | 0 | 100   |
| Rose Valley             | 0 | 100   |
| Studebaker x Nordic Oct | 0 | 100   |

182 Table 1: GSA rating and range of uniformity of starch granules from 60 potato varieties and  
183 selections.

#### 184 **Water absorption capacity of starch**

185 During the development of the assay to measure the water absorption capacity (WAC)  
186 during starch gel formation, we found that it was essential to handle the samples carefully after the  
187 final centrifugation, with minimum vibration, since removing the supernatant was difficult in some  
188 samples. The WAC data for 60 varieties and selections, is shown with standard deviations in Table  
189 2. The ten varieties with the lowest water absorption were the same as those with the highest GSA  
190 scores. These included Huckleberry Gold, Muru, Bzura, Michigan October, and the F-1 hybrid  
191 Michigan October X Colorado Rose (Figure 2). The October Blue x Colorado Rose hybrid was  
192 ranked third lowest in its relative capacity to absorb water.

| Variety       | Water Absorption Capacity WAC |   | Standard Deviation |
|---------------|-------------------------------|---|--------------------|
| Monona        | 21.6                          | ± | 2.3                |
| Chipitiquilla | 21.5                          | ± |                    |
| Skagit Magic  | 20.8                          | ± | 2.3                |
| Picasso       | 20.5                          | ± |                    |
| Cherry red    | 20.3                          | ± | 1.7                |
| C97007        | 20                            | ± | 1.2                |
| Katelidan     | 19.4                          | ± | 3.9                |
| Purple Valley | 18.3                          | ± | 4.5                |
| Bison         | 18.2                          | ± | 2.3                |
| Rose Valley   | 18                            | ± | 1.6                |

|                      |      |   |     |
|----------------------|------|---|-----|
| Garnet Chili         | 17.8 | ± | 2.2 |
| Chelan               | 17.4 | ± |     |
| Nicola               | 17.3 | ± | 2.1 |
| Iker                 | 17.2 | ± | 1.6 |
| Phytophyter          | 17   | ± | 2.1 |
| Dark Red Norland     | 16.9 | ± | 4.1 |
| Juice Valley         | 16.4 | ± | 2.4 |
| Bolivian Spring      | 16.1 | ± | 3.7 |
| Charlotte            | 15.8 | ± | 2.8 |
| Golden Anniversary   | 15.7 | ± | 2.8 |
| Goldra               | 15.7 | ± | 2.7 |
| Pirola               | 15.7 | ± | 0.9 |
| Asun                 | 15.6 | ± | 3   |
| Anolla               | 15.5 | ± | 0.9 |
| Laram K'anchali      | 15.5 | ± | 1.2 |
| I 1035               | 15.4 | ± | 5   |
| Bjorna               | 15.4 | ± | 2.1 |
| Sassy Lassy          | 15.2 | ± | 2.3 |
| Chella x Bulk Clover | 15.1 | ± | 1.1 |
| NH x SPG             | 14.9 | ± | 1.2 |
| Sangre               | 14.9 | ± | 0.5 |
| Violet Butter        | 14.7 | ± | 1.3 |
| Arma                 | 14.5 | ± | 2.6 |

|                         |      |   |     |
|-------------------------|------|---|-----|
| I 1036                  | 14   | ± | 3.1 |
| Studebaker x Nordic Oct | 13.8 | ± | 1.9 |
| Bzura                   | 13.7 |   |     |
| Rush Share              | 13.6 | ± | 1.1 |
| X Gem                   | 13.6 | ± | 0.8 |
| Leona                   | 13.4 | ± | 1   |
| Bolivian Blizzard       | 13.2 | ± | 1.7 |
| Olalla                  | 13.2 | ± | 1.6 |
| Bareroot River          | 13.1 | ± | 3.2 |
| Arcilla-597779          | 12.9 | ± | 1.2 |
| Allegany                | 12.9 | ± | 1.9 |
| Green Mountain          | 12.8 | ± | 1.3 |
| Lumper                  | 12.7 | ± | 1.3 |
| Multa                   | 12.3 | ± | 1.8 |
| Biddy Taro              | 12.2 | ± | 0.6 |
| Fontenay                | 12.1 | ± | 1.3 |
| Marble Gold             | 12   | ± | 1.1 |
| Oct Blue                | 12   | ± |     |
| Norland                 | 11.5 | ± | 0.8 |
| Yukon Gold              | 11.2 | ± | 2.1 |
| Red Pontiac             | 10.9 | ± | 2   |
| Papa Amorga             | 10.6 | ± | 0.7 |
| Muru                    | 10.5 | ± | 0.6 |

|                     |      |   |     |
|---------------------|------|---|-----|
| Mich Oct x John T   | 10.4 | ± | 0.3 |
| Oct Blue x Col Rose | 9.9  | ± | 0.9 |
| Huckleberry Gold    | 9.5  | ± | 0.7 |
| Russet Burbank      | 9.5  | ± | 0.8 |

193 Table 2: Water absorption capacity (WAC) and standard deviations of 60 potato varieties and  
194 selections.

### 195 **Determination of Amylose percentage**

196 We encountered a wide range of deviations when we assessed amylose percentage, using  
197 the Jarvis and Walker approach (37). Fajardo et al (16) reported that using absorbance changes at  
198 the optimum wavelengths can provide highly consistent results. Fajaro, et al (16) found that the  
199 maximum absorbance of the amylose-iodine complex was at 620 nm and the maximum absorbance  
200 of the amylopectin-iodine complex was at 550 nm. Thus the percent amylose can be determined:

201 
$$\text{Amylose \%} = y = 107.7x - 77.4$$

202 Where  $x = A_{620\text{nm}}/A_{550\text{nm}}$ , measured against the reagent blank.

203 We Successfully screened 60 potato varieties in triplicate to present their respective  
204 standard deviations. The amylose ratings of 60 potato varieties and selections are shown in Table  
205 3. The potato varieties with a higher concentration of amylose are Green Mountain, Muru, Bzura,  
206 Multa, Huckleberry Gold, and the F-1 cross October Blue X Colorado Rose. These samples also  
207 had high surface alterations of their starch granules, which supports our initial hypothesis that this  
208 granule feature was due to higher amylose.

209

| Particulate Ammonia (%) | Ammonia (%) |
|-------------------------|-------------|
| Green Mountain          | 60.9        |
| Muru                    | 59.0        |
| Bzura                   | 50.4        |
| Multa                   | 44.7        |
| Huckleberry Gold        | 44.7        |
| Oct Blue x Col Rose     | 43.8        |
| Laram K'anchali         | 43.8        |
| NH x SPG                | 40.4        |
| Lumper                  | 39.7        |
| Anolla                  | 39.5        |
| Bjorna                  | 38.3        |
| Iker                    | 37.1        |
| Sassy Lassy             | 37.1        |
| X Gem                   | 36.6        |
| Chipitiquilla           | 35.7        |
| Red Pontiac             | 35.0        |
| Bolivian Blizzard       | 34.7        |
| Phytophyter             | 34.5        |
| Papa Amorga             | 34.2        |
| Skagit Magic            | 34.2        |
| Oct Blue                | 33.6        |
| Dark Red Norland        | 33.3        |
| Juice Valley            | 33.3        |



|                         |      |
|-------------------------|------|
| Studebaker x Nordic Oct | 32.9 |
| Cherry Red              | 32.8 |
| Marble Gold             | 32.7 |
| Fontenay                | 32.5 |
| Nicola                  | 32.3 |
| Leona                   | 32.3 |
| Arma                    | 31.9 |
| Mich Oct x John T       | 31.8 |
| Arcilla-597779          | 31.4 |
| Pirola                  | 31.2 |
| Rose Valley             | 31.2 |
| Violet Butter           | 30.9 |
| Norland                 | 30.8 |
| Bolivian Spring         | 30.7 |
| Katelidan               | 30.7 |
| I 1035                  | 30.4 |
| I 1036                  | 30.4 |
| Yukon Gold              | 30.4 |
| Olalla                  | 30.0 |
| Biddy Taro              | 29.8 |
| Bareroot River          | 29.2 |
| Sangre                  | 28.9 |
| Goldra                  | 28.8 |

210

211

212

213

|                      |      |
|----------------------|------|
| Garnet Chile         | 28.3 |
| Asun                 | 27.7 |
| Monona               | 27.6 |
| C97007               | 27.4 |
| Charlotte            | 27.1 |
| Chelan               | 26.6 |
| Rush Share           | 26.6 |
| Bison                | 26.2 |
| Golden Anniversary   | 25.0 |
| Allegany             | 24.1 |
| Chella x Bulk Clover | 24.0 |
| Picasso              | 23.9 |
| Purple Valley        | 23.9 |
| Russet Burbank       | 23.7 |

Table 3: Amylose content (%) of 60 potato varieties and selections.

| Variety             | % Amylose Content | Starch Granule Ranking | Water Absorption |
|---------------------|-------------------|------------------------|------------------|
| Green Mountain      | 61                | 3                      | 13               |
| Muru                | 59                | 5                      | 10               |
| Bzura               | 50                | 5                      | 13               |
| Huckleberry Gold    | 45                | 5                      | 9                |
| Multa               | 45                | 5                      | 12               |
| Oct. Blue x Col Red | 44                | 3                      | 9                |
| Monona              | 28                | 2                      | 22               |
| Picasso             | 24                | 1                      | 21               |

|               |    |   |    |
|---------------|----|---|----|
| Purple Valley | 24 | 2 | 18 |
|---------------|----|---|----|

214 **Table 4:** Compilation of traits of seven selected cultivars compared to three cultivars with high  
 215 amylose content.

216 **Calculation of potential glycemic index based on amylose percentage**

217           Moreira’s study in 2012 (38) measured the blood sugar levels in subjects two hours after  
 218 eating a starchy meal with a known concentration of amylose, and reported a correlation  
 219 equation where x is the amylose percentage of total starch content and GI<sub>p</sub> is the GI potential  
 220 value (GI<sub>p</sub>). Using this calculation and the amylose content of potato varieties and selections, a  
 221 GI<sub>p</sub> can be calculated (Table 5).

| Variety             | % amylose | GI potential | Variety           | % amylose | GI potential |
|---------------------|-----------|--------------|-------------------|-----------|--------------|
| Green Mountain      | 60.9      | (14.69)      | Mich Oct x John T | 31.8      | 73.28        |
| Muru                | 59.0      | (8.94)       | Arcilla-597779    | 31.4      | 74.43        |
| Bzura               | 50.4      | 16.93        | Pirola            | 31.2      | 75.14        |
| Huckleberry         | 44.7      | 34.18        | Rose Valley       | 31.2      | 75.14        |
| Multa               | 44.7      | 34.18        | Violet Butter     | 30.9      | 75.90        |
| Oct Blue x Col Rose | 43.8      | 37.06        | Norland           | 30.8      | 76.17        |
| NH x SPG            | 40.4      | 47.12        | Bolivian Spring   | 30.7      | 76.65        |
| Lumper              | 39.7      | 49.35        | Katelidan         | 30.7      | 76.66        |
| Anolla              | 39.5      | 49.99        | I 1035            | 30.4      | 77.31        |
| Bjorna              | 38.3      | 53.57        | Yukon Gem         | 30.4      | 77.31        |
| Iker                | 37.1      | 57.15        | I 1036            | 30.4      | 77.51        |
| Sassy Lassy         | 37.1      | 57.22        | Olalla            | 30.0      | 78.72        |
| X gem               | 36.6      | 58.62        | Biddy Taro        | 29.8      | 79.28        |

|                         |      |       |                    |      |       |
|-------------------------|------|-------|--------------------|------|-------|
| Chipitiquilla           | 35.7 | 61.45 | Bareroot River     | 29.2 | 81.13 |
| Red Pontiac             | 35.0 | 63.54 | Sangre             | 28.9 | 81.99 |
| Bolivian Blizzard       | 34.7 | 64.46 | Goldra             | 28.8 | 82.25 |
| Phytophyter             | 34.5 | 65.17 | Garnet Chile       | 28.3 | 83.65 |
| Iaram K'anchali         | 34.2 | 65.81 | Asun               | 27.7 | 85.70 |
| Skagit Magic            | 34.2 | 65.81 | Monona             | 27.6 | 85.73 |
| Papa Amorga             | 34.2 | 65.96 | C97007             | 27.4 | 86.43 |
| Oct Blue                | 33.6 | 67.76 | Charlotte          | 27.1 | 87.37 |
| Dark Red Norland        | 33.3 | 68.68 | Chelan             | 26.6 | 88.81 |
| Juice Valley            | 33.3 | 68.75 | Rush Share         | 26.6 | 88.89 |
| Studebaker x Nordic Oct | 32.9 | 69.77 | Bison              | 26.2 | 89.97 |
| Cherry Red              | 32.8 | 70.12 | Golden Anniversary | 25.0 | 93.81 |
| Marble Gold             | 32.7 | 70.58 | Allegany           | 24.1 | 96.44 |

222

223 Table 5: Predicted glycemic index (GIP) of 52 potato varieties and selections calculated using the  
 224 equation described by Moreira (38). GIp = Glycemic Index potential.

225 The GIp for Green Mountain and Muru, the two varieties with the highest percentage of  
 226 amylose have negative values, which could suggest that such high amylose samples were outside  
 227 the range of Moreira's equation.

228 Pearson's correlation coefficient tests were performed to study the possible relationship  
229 between granular surface appearance of starch granules (GSA), granule absorption capacity  
230 (GAC), and amylose content by spectrophotometric analysis in multiple potato varieties and  
231 selections. There was a positive correlation between GSA scores and the amylose content of the  
232 potato starch ( $r^2 = 0.46$ ,  $p < 0.05$ ). There was a negative correlation between GAC and amylose  
233 content ( $r^2 = -0.34$ ,  $p > 0.01$ ), confirming the hypothesis that amylose inhibits water absorption by  
234 potato starch. These results agree with observations with peas since high amylose peas are more  
235 wrinkled and cause a much lower insulin response in humans than smooth peas (41). The wrinkled  
236 peas also have a lower capacity to absorb water (42).

## 237 **Discussion**

238 Nutrition data suggest that consumption of potatoes with higher concentrations of amylose  
239 would have a lower Glycemic Index and would be expected to provide a health benefit for people  
240 that have prediabetes, diabetes and/or obesity. A lower sugar release during digestion is expected  
241 to cause a lower sugar spike and lower release of insulin, due to differences of digestibility of  
242 amylose and amylopectin (4,12,31,41,43). Furthermore, high insulin release tends to lead to an  
243 undershoot in desirable blood sugar levels (hypoglycemia), stimulating hunger and potential  
244 weight gain.

245 From a sample of over 60 cultivars, we have been able to identify the six-candidate  
246 cultivars for further agronomic evaluation for consumer acceptability. Those samples are as  
247 follows: Huckleberry Gold, Muru, Bzura, October Blue x Colorado Rose, Multa, and Green  
248 Mountain. In addition to the consumer dilemma on choices of affordable healthy foods, there is  
249 the Breeders' Dilemma that is the conflict between improved food nutrition that often reduces

250 agronomic yield, which usually drives the choice of varieties (40). To pursue this aim, we  
251 identified patterns in properties of potato starch that could be used in rapid screening. By screening  
252 of 60 potato lines A pattern was identified in the microscopic appearance of starch granules,  
253 confirmed by direct starch content assays, permitting a rapid initial screening of candidate potato  
254 varieties for increased amylose content and potential lower Glycemic Index. This rapid screening  
255 system will allow elevation of nutrition as a priority in plant breeding.

256 This work now will be followed by glycemic index measurements and agronomic fitness (40,41)  
257 on the most promising potato varieties.

## 258 **Acknowledgement**

259 This paper was supported by Western SARE Project SW12-108, Montana State University  
260 Agricultural Experiment Station.

## 261 **References**

- 262 1. Sami, Waqas, et al. "Effect of diet on type 2 diabetes mellitus: A review." *International*  
263 *journal of health sciences* 11.2 (2017): 65.
- 264 2. Camire ME, Kubow S, Donnelly DJ. Potatoes and human health. *Crit Rev Food Sci Nutr*.  
265 2009;49(10):823–40.
- 266 3. Seidell JC. Obesity, insulin resistance and diabetes - A worldwide epidemic. In: *British*  
267 *Journal of Nutrition*. 2000.
- 268 4. Diabetes Federation I. Worldwide toll of diabetes. 2019.  
269 <https://www.diabetesatlas.org/en/sections/worldwide-toll-of-diabetes.html>  
270
- 271 5. de Haan S, Rodriguez F, Singh J, Kaur L. Chapter 1 - Potato Origin and Production. In:  
272 *Advances in Potato Chemistry and Technology*. 2016. p. 1–32.

- 273 6. Zaheer K, Akhtar MH. Recent advances in potato production, usage, and nutrition. Crit Rev  
274 Food Sci Nutr. 2016;
- 275 7. Fernandes G, Velangi A, Wolever TMS. Glycemic index of potatoes commonly consumed  
276 in North America. J Am Diet Assoc. 2005;105(4).
- 277 8. Ek KL, Brand-Miller J, Copeland L. Glycemic effect of potatoes. Food Chem. 2012;133(4).
- 278 9. Vamadevan V, Bertoft E. Structure-function relationships of starch components. Vol. 67,  
279 Starch/Staerke. 2015.
- 280 10. Wolever TMS, DJA Jenkins, AL Jenkins and RG Josse. 1991. The glycemic index:  
281 Methodology and clinical implications. Am J Clin Nutr 54:846-854
- 282 11. Tenduis M, Low-carb potatoes on the rise. Fresh Plaza. 2018; 7: 18. Available from:  
283 <https://www.freshplaza.com/article/2193080/low-carb-potatoes-on-the-rise>.
- 284 12. Sarkar, D., Walker-Swaney, J., & Shetty, K. (2020). Food diversity and  
285 indigenous  
286 food systems to combat diet-linked chronic diseases. *Current developments in*  
287 *nutrition, 4* (Supplement\_1), 3-11.
- 288 13. Hofvander P, Andersson M, Larsson CT, Larsson H. Field performance and starch  
289 characteristics of high-amylose potatoes obtained by antisense gene targeting of two  
290 branching enzymes. Plant Biotechnol J. 2004;2(4).
- 291 14. Singh J, Kaur L. Advances in Potato Chemistry and Technology. Advances in Potato  
292 Chemistry and Technology. 2009.

- 293 15. Chung HJ, Li XQ, Kalinga D, Lim ST, Yada R, Liu Q. Physicochemical properties of dry  
294 matter and isolated starch from potatoes grown in different locations in Canada. *Food Res*  
295 *Int.* 2014;57.
- 296 16. Fajardo, D., Jayanty, S.S., Jansky, S.H. Rapid High Throughput Amylose Determination in  
297 Freeze Dried Potato Tuber Samples. *J. Vis. Exp.* (80), e50407, doi:10.3791/50407 (2013).
- 298 17. Hoover R. Composition, molecular structure, and physicochemical properties of tuber and  
299 root starches: A review. *Carbohydr Polym.* 2001;45(3).
- 300 18. Karlsson ME, Leeman AM, Björck IME, Eliasson AC. Some physical and nutritional  
301 characteristics of genetically modified potatoes varying in amylose/amylopectin ratios.  
302 *Food Chem.* 2007;100(1).
- 303 19. Moongngarm A. Chemical compositions and resistant starch content in starchy foods. *Am*  
304 *J Agric Biol Sci.* 2013;8(2).
- 305 20. Mukerjea R, Mukerjea R, Robyt JF. Starch biosynthesis: experiments on how starch  
306 granules grow in vivo. *Carbohydr Res.* 2009;344(1).
- 307 21. Pietrzyk S, Fortuna T, Juszczak L, Gałkowska D, Bączkiewicz M, Łabanowska M, et al.  
308 Influence of amylose content and oxidation level of potato starch on acetylation, granule  
309 structure and radicals' formation. *Int J Biol Macromol.* 2018;106.
- 310 22. Smith AM. The biosynthesis of starch granules. Vol. 2, *Biomacromolecules.* 2001.
- 311 23. Man J, Yang Y, Zhang C, Zhou X, Dong Y, Zhang F, et al. Structural changes of high-  
312 amylose rice starch residues following in vitro and in vivo digestion. *J Agric Food Chem.*  
313 2012;60(36):9332–41.



- 314 24. Shu X, Backes G. in a Barley Variety Collection. 2012;
- 315 25. Tester RF, Karkalas J, Qi X. Starch - Composition, fine structure and architecture. Journal  
316 of Cereal Science. 2004.
- 317 26. Kaur L, Singh J, McCarthy OJ, Singh H. Physico-chemical, rheological and structural  
318 properties of fractionated potato starches. J Food Eng. 2007;82(3).
- 319 27. Singh N, Sandhu KS, Kaur M. Characterization of starches separated from Indian chickpea  
320 (*Cicer arietinum* L.) cultivars. J Food Eng. 2004;
- 321 28. Zheng Y, Wang Q, Li B, Lin L, Tundis R, Loizzo MR, et al. Characterization and prebiotic  
322 effect of the resistant starch from purple sweet potato. Molecules. 2016;21(7).
- 323 29. Li G, Zhu F. Amylopectin molecular structure in relation to physicochemical properties of  
324 quinoa starch. Carbohydr Polym. 2017;164.
- 325 30. Vamadevan V, Bertoft E. Observations on the impact of amylopectin and amylose structure  
326 on the swelling of starch granules. Food Hydrocoll. 2020;103.
- 327 31. Zhu L, Gu M, Meng X, Cheung SCK, Yu H, Huang J, et al. High-amylose rice improves  
328 indices of animal health in normal and diabetic rats. Plant Biotechnol J. 2012;10(3):353–  
329 62.
- 330 32. USDA.Potato seed bank. Available from: [https://wisconsinpotatoes.com/wp-](https://wisconsinpotatoes.com/wp-content/uploads/2020/03/DC-FlyIn-flyer.jpg)  
331 [content/uploads/2020/03/DC-FlyIn-flyer.jpg](https://wisconsinpotatoes.com/wp-content/uploads/2020/03/DC-FlyIn-flyer.jpg)
- 332 33. Shi YC, Capitani T, Trzasko P, Jeffcoat R. Molecular structure of a low-amylopectin starch  
333 and other high-amylose maize starches. J Cereal Sci. 1998;27(3).

- 334 34. Martin JM, Talbert LE, Habernicht DK, Lanning SP, Sherman JD, Carlson G, et al. Reduced  
335 Amylose Effects on Bread and White Salted Noodle Quality. *Cereal Chem.* 2004;81(2).
- 336 35. Sasaki T, Matsuki J. Effect of wheat starch structure on swelling power. *Cereal Chem.*  
337 1998;75(4).
- 338 36. Rundle RE. The Configuration of Starch in the Starch-Iodine Complex. V. Fourier  
339 Projections from X-Ray Diagrams. *J Am Chem Soc.* 1947;69(7).
- 340 37. Jarvis CE, Walker JRL. Simultaneous, rapid, spectrophotometric determination of total  
341 starch, amylose and amylopectin. *J Sci Food Agric.* 1993;63(1).
- 342 38. Moreira TS. The Role of Starch physicochemical properties in determining the Glycemic  
343 Index of Novel Potato varieties. University of Toronto.; 2012.
- 344 39. Soh N, Brand-Miller J. The glycaemic index of potatoes: the effect of variety, cooking  
345 method and maturity. *Eur J Clin Nutr.* 1999 Apr;53(4):249–54.
- 346 40. Sands DC, Morris CE, Dratz EA, Pilgeram AL. Elevating optimal human nutrition to a  
347 central goal of plant breeding and production of plant-based foods. Vol. 177, *Plant Science.*  
348 2009.
- 349 41. Megdal PA, Siemsen D, Sands D, Dratz EA, Handelman GJ. Facile fingerstick insulin  
350 analysis: Application to monitoring postprandial insulin responses to snack foods. *J*  
351 *Diabetes.* 2010;2(1):28–35.
- 352 42. Kosson R, Czuchajowska Z, Pomeranz Y. Smooth and Wrinkled Peas. 1. General Physical  
353 and Chemical Characteristics. *J Agric Food Chem.* 1994;42(1).

- 354 43. Wong, J. M., & Jenkins, D. J. (2007). Carbohydrate digestibility and metabolic effects. *The*  
355 *Journal of nutrition*, 137(11), 2539S-2546S.

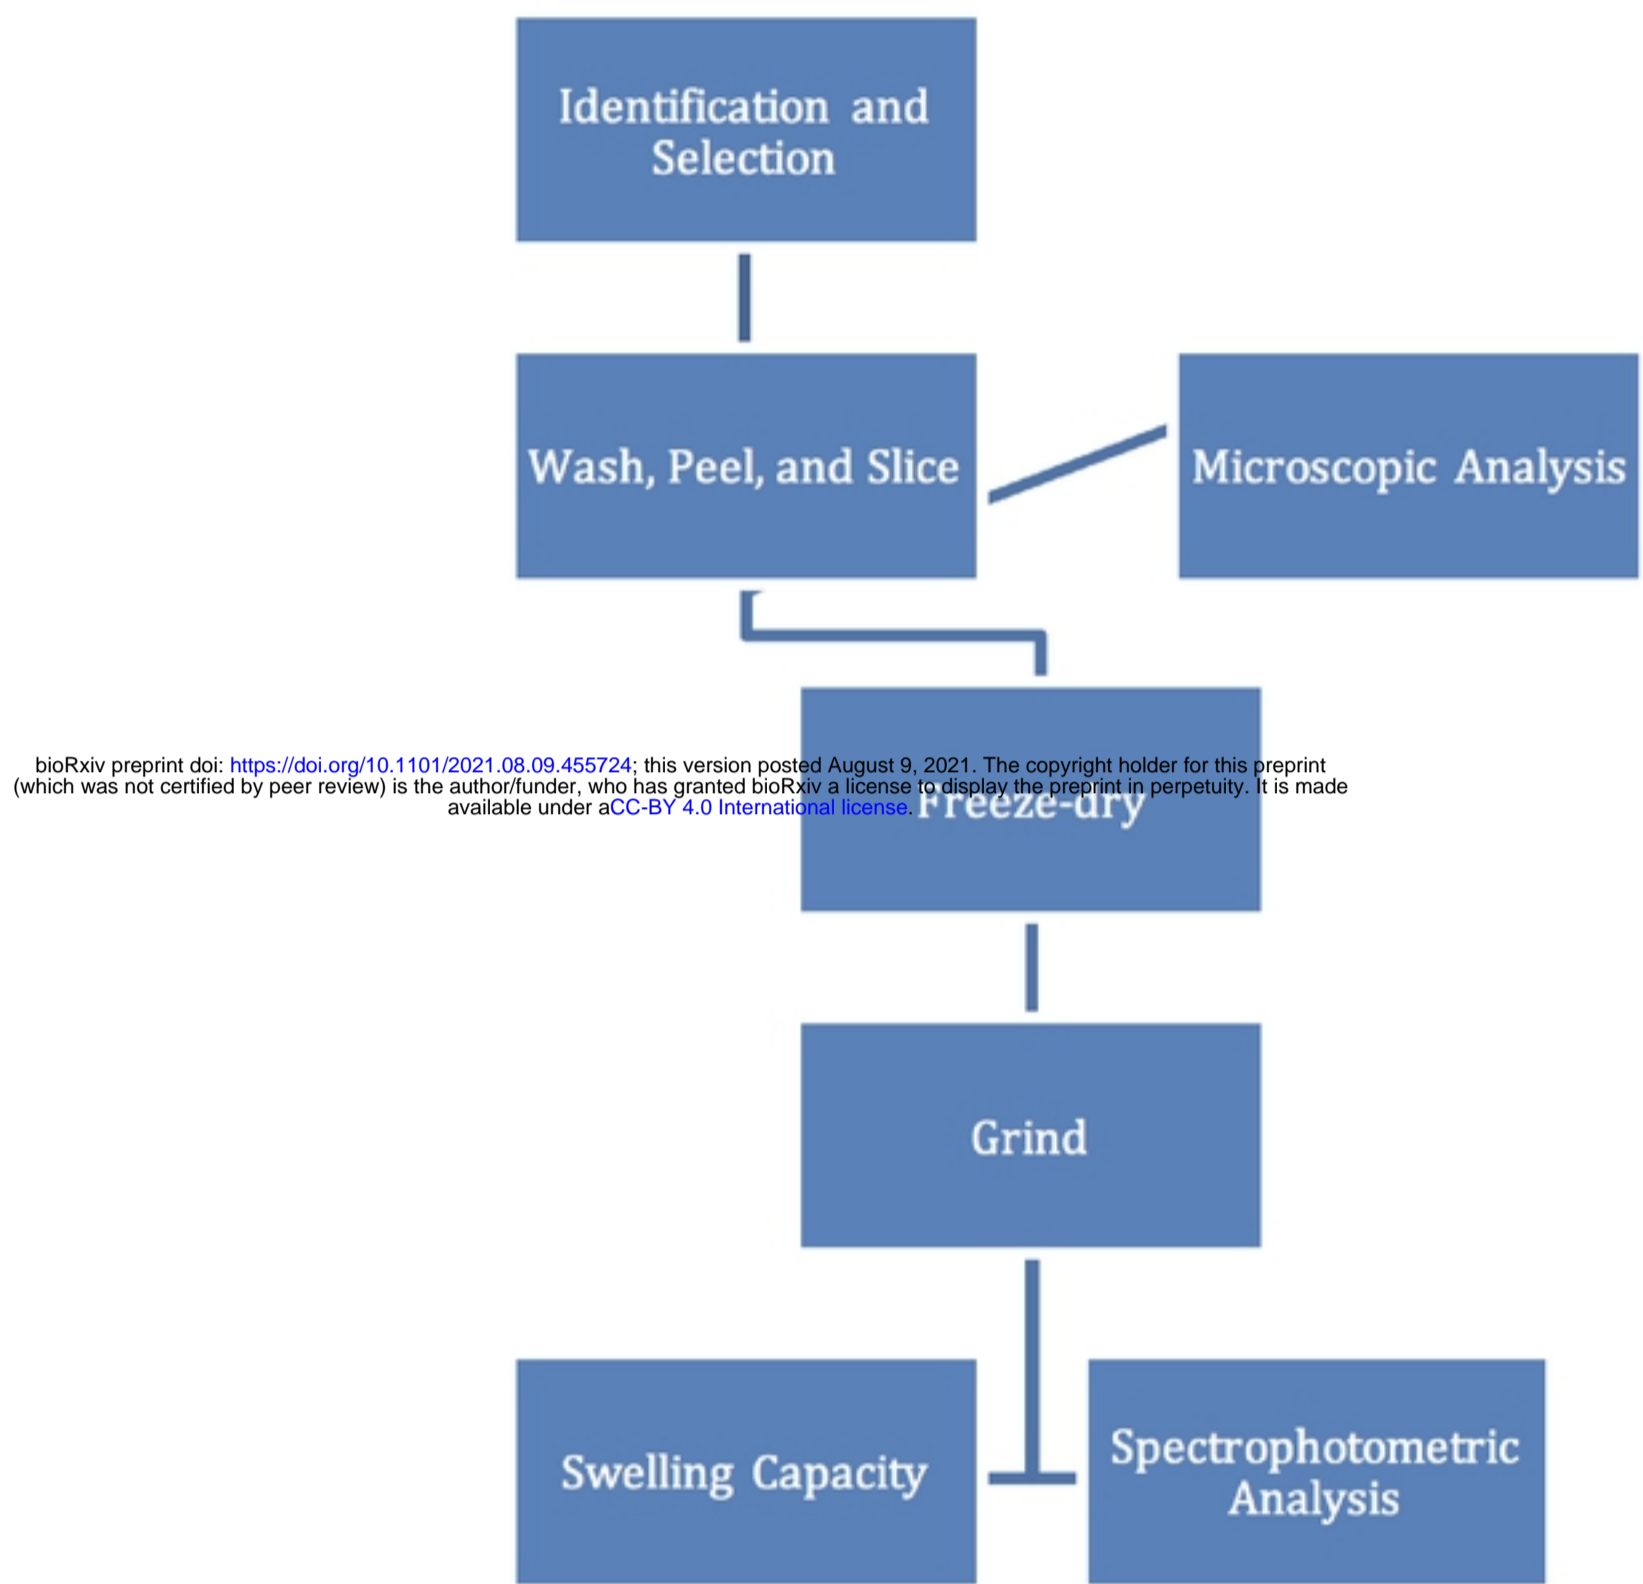

---

FIG 2

| Description | Whole smooth granule, halo visible                                                | Whole smooth granule with points                                                  | Whole smooth granule with wrinkles                                                  | Whole granule with surface alteration                                               | Granule with fracturing                                                             | Collapsed granule                                                                   |
|-------------|-----------------------------------------------------------------------------------|-----------------------------------------------------------------------------------|-------------------------------------------------------------------------------------|-------------------------------------------------------------------------------------|-------------------------------------------------------------------------------------|-------------------------------------------------------------------------------------|
| Images      | 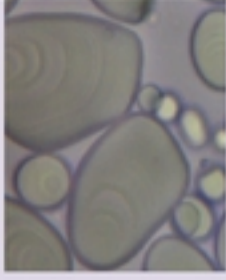 |  |  |  |  |  |
| Ranking     | 0                                                                                 | 1                                                                                 | 2                                                                                   | 3                                                                                   | 4                                                                                   | 5                                                                                   |

Fig 3

bioRxiv preprint doi: <https://doi.org/10.1101/2021.08.09.455724>; this version posted August 9, 2021. The copyright holder for this preprint (which was not certified by peer review) is the author/funder, who has granted bioRxiv a license to display the preprint in perpetuity. It is made available under a [CC-BY 4.0 International license](https://creativecommons.org/licenses/by/4.0/).

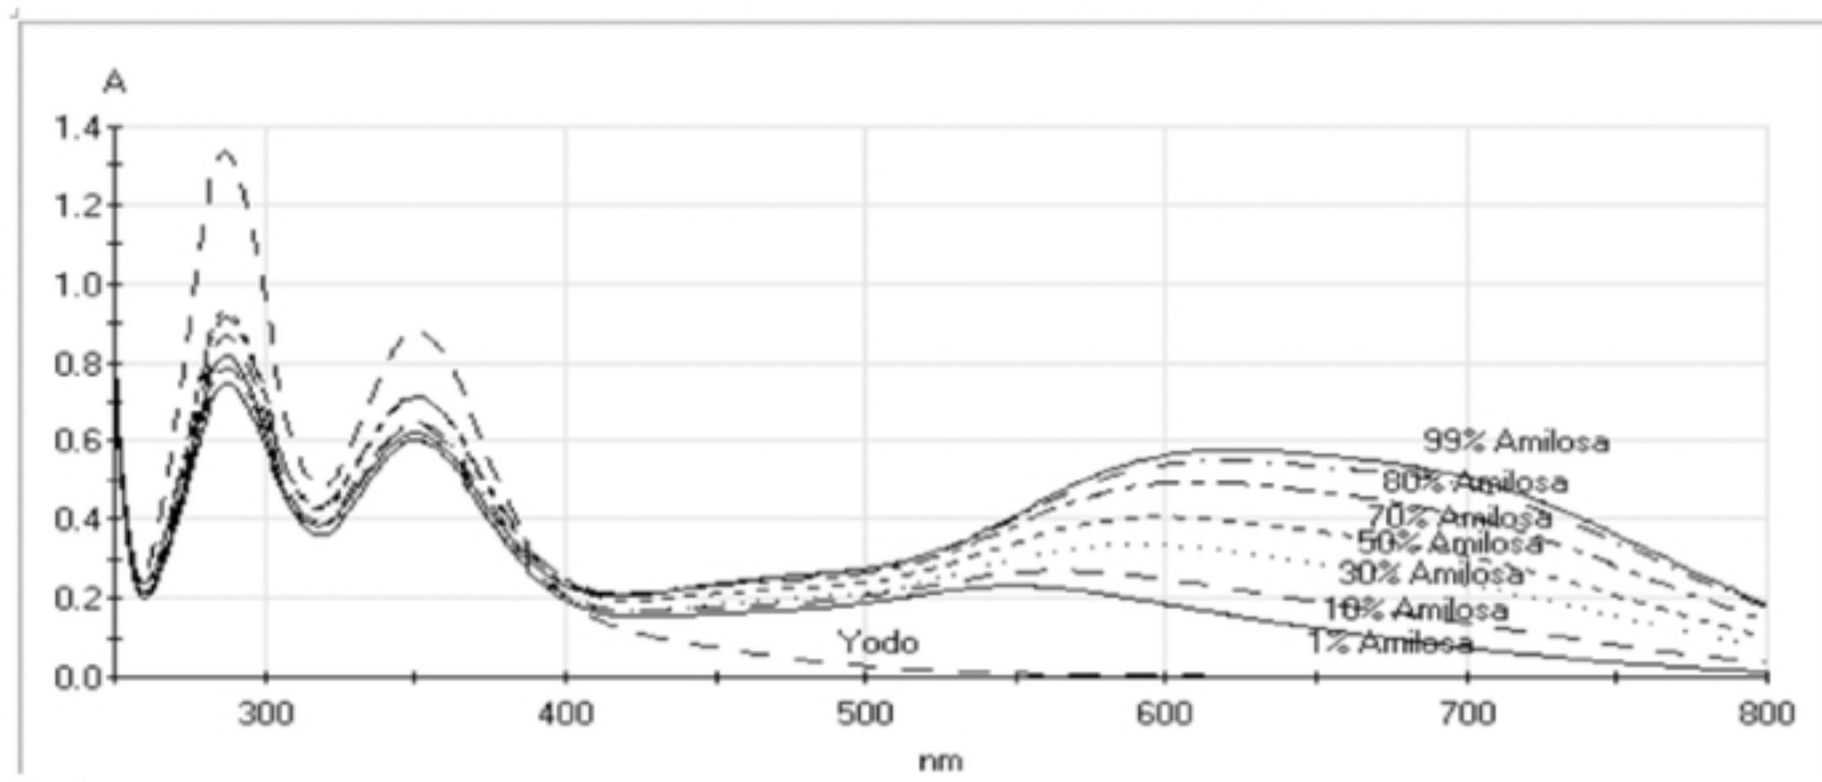

Fig 4

bioRxiv preprint doi: <https://doi.org/10.1101/2021.08.09.455724>; this version posted August 9, 2021. The copyright holder for this preprint (which was not certified by peer review) is the author/funder, who has granted bioRxiv a license to display the preprint in perpetuity. It is made available under a [CC-BY 4.0 International license](https://creativecommons.org/licenses/by/4.0/).

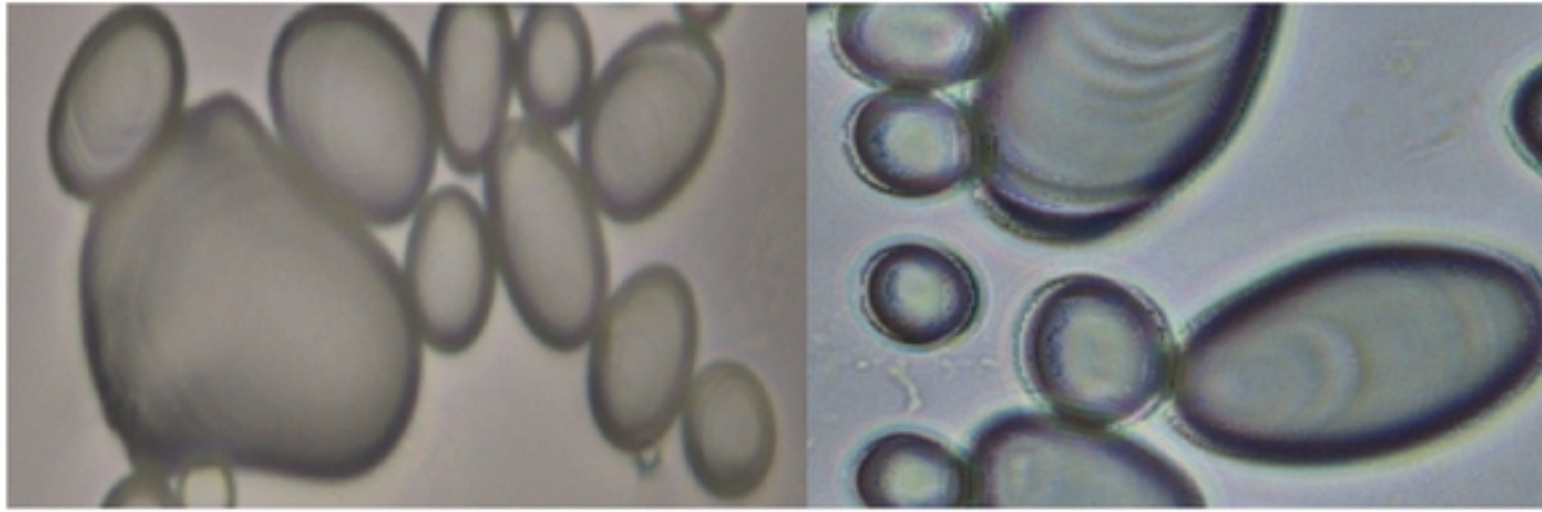

Fig 5

bioRxiv preprint doi: <https://doi.org/10.1101/2021.08.09.455724>; this version posted August 9, 2021. The copyright holder for this preprint (which was not certified by peer review) is the author/funder, who has granted bioRxiv a license to display the preprint in perpetuity. It is made available under a [CC-BY 4.0 International license](#).

| Type  | Huckleberry                                                                       | Muru                                                                              | Multa                                                                              | Bzura                                                                               | Mich. October                                                                       |
|-------|-----------------------------------------------------------------------------------|-----------------------------------------------------------------------------------|------------------------------------------------------------------------------------|-------------------------------------------------------------------------------------|-------------------------------------------------------------------------------------|
| Image | 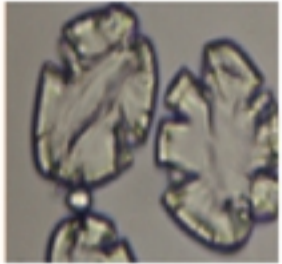 |  |  |  |  |

bioRxiv preprint doi: <https://doi.org/10.1101/2021.08.09.455724>; this version posted August 9, 2021. The copyright holder for this preprint (which was not certified by peer review) is the author/funder, who has granted bioRxiv a license to display the preprint in perpetuity. It is made available under a [CC-BY 4.0 International license](#).



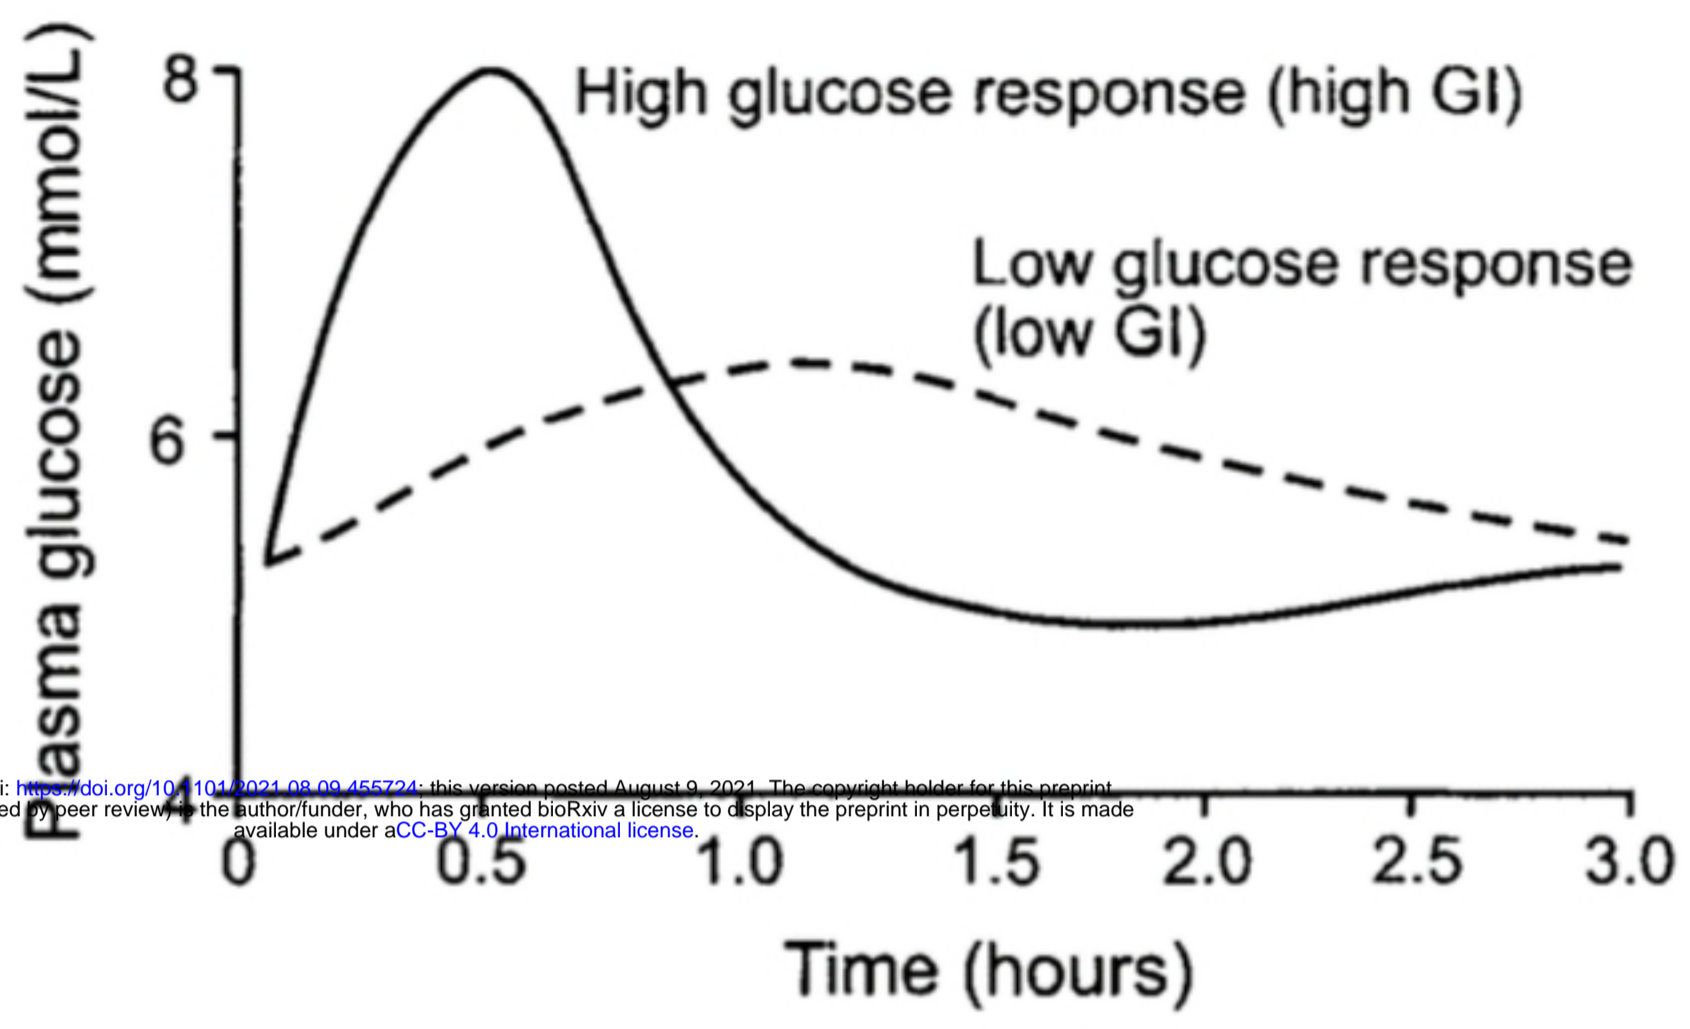

bioRxiv preprint doi: <https://doi.org/10.1101/2021.08.09.455724>; this version posted August 9, 2021. The copyright holder for this preprint (which was not certified by peer review) is the author/funder, who has granted bioRxiv a license to display the preprint in perpetuity. It is made available under a [CC-BY 4.0 International license](https://creativecommons.org/licenses/by/4.0/).

FIG 1

Fig 2

Figure 1
